# Supplementary material for: Degenerative Thoracic Myelopathy: A Scoping Review of Epidemiology, Genetics, and Pathogenesis
Source: PubMed Central journal article supplement — Global Spine J. 2023 Dec 26;14(5):1664–77. doi: 10.1177/21925682231224768 (PMC11394495; doi:10.1177/21925682231224768), 2023-12-26
Supplement: sj-pdf-1-gsj-10.1177_21925682231224768.pdf [file sj-pdf-1-gsj-10.1177_21925682231224768.pdf]

**Supplementary Table 1.** Table showing the included studies from the literature search

|     | Included Studies                                                                                                                                                                                                                                                                                                                   |
|-----|------------------------------------------------------------------------------------------------------------------------------------------------------------------------------------------------------------------------------------------------------------------------------------------------------------------------------------|
| 1.  | Yamazaki M, Mochizuki M, Ikeda Y, et al. Clinical results of surgery for thoracic myelopathy caused by ossification of the posterior longitudinal ligament: Operative indication of posterior decompression with instrumented fusion. <i>Spine (Phila Pa 1976)</i> . 2006;31(13):1452-1460. doi:10.1097/01.brs.0000220834.22131.fb |
| 2.  | Akhaddar A, Mansouri A, Zrara I, et al. Thoracic spinal cord compression by ligamentum flavum ossifications. <i>Jt Bone Spine</i> . 2002;69(3):319-323. doi:10.1016/S1297-319X(02)00400-1                                                                                                                                          |
| 3.  | Barnett GH, HARDY RW, LITTLE J, BAY J. Thoracic spinal canal stenosis. <i>J Neurosurg</i> . 1988;68(1):160-161. doi:10.3171/jns.1988.68.1.0160                                                                                                                                                                                     |
| 4.  | Mo L, Wang Z, Du J. Thoracic myelopathy caused by ossification of the ligamentum flavum. <i>J Korean Neurosurg Soc</i> . 2013;46(3):189-194. doi:10.3340/jkns.2009.46.3.189                                                                                                                                                        |
| 5.  | Shiguematsu FY, de Souza ECC, Zimmermann AF, Castro GRW, Pereira IA, Neves FS. Thoracic myelopathy due to calcification of the ligamentum flavum with hyperproteinorachia and responsive to steroid therapy: Case report. <i>Rev Bras Reumatol</i> . 2012;52(3):438-446.                                                           |
| 6.  | Teufack S, Campbell P, Sharma P, et al. Thoracic myelopathy due to an intramedullary herniated nucleus pulposus: First case report and review of the literature. <i>Neurosurgery</i> . 2012;71(1):199-202. doi:10.1227/NEU.0b013e3182582cf1                                                                                        |
| 7.  | Cornips EMJ, Janssen MLE, Beuls EAM. Thoracic disc herniation and acute myelopathy: Clinical presentation, neuroimaging findings, surgical considerations, and outcome: Clinical article. <i>J Neurosurg Spine</i> . 2011;14(4):520-528. doi:10.3171/2010.12.SPINE10273                                                            |
| 8.  | Seidenwurm DJ, Wippold FJ, Cornelius RS, et al. ACR appropriateness criteria® myelopathy. <i>J Am Coll Radiol</i> . 2012;9(5):315-324. doi:10.1016/j.jacr.2012.01.010                                                                                                                                                              |
| 9.  | Girardi FP, Sax OC, Salzmann S, Shue J. JSM Neurosurgery and Spine Literature Review of Thoracic Myelopathy: Causes of Acute Worsening. <i>JSM Neurosurg Spine</i> . 2016;4(4):4-7.                                                                                                                                                |
| 10. | Henderson FC, Austin C, Benzel E, et al. Neurological and spinal manifestations of the Ehlers–Danlos syndromes. <i>Am J Med Genet Part C Semin Med Genet</i> . 2017;175(1):195-211. doi:10.1002/ajmg.c.31549                                                                                                                       |
| 11. | Ding Y, Lv S, Dong S, Cui J, Cao Z, Chen Y. Relationship between scheuermann disease and symptomatic thoracic spinal stenosis: A retrospective study. <i>Acta Orthop Traumatol Turc</i> . 2021;55(3):253-257. doi:10.5152/j.aott.2021.20022                                                                                        |
| 12. | Kapetanios GA, Hantzidis PT, Anagnostidis KS, Kirkos JM. Thoracic cord compression caused by disk herniation in Scheuermann’s disease: A case report and review of the literature. <i>Eur Spine J</i> . 2006;15(SUPPL. 5):553-558. doi:10.1007/s00586-005-0053-0                                                                   |
| 13. | Arai Y, Takagi T, Matsuda T, Kurosawa H. Myelopathy due to scoliosis with vertebral hypertrophy in Klippel-Trenaunay-Weber syndrome. <i>Arch Orthop Trauma Surg</i> . 2002;122(2):120-122. doi:10.1007/s004020100334                                                                                                               |
| 14. | Ando K, Imagama S, Kobayashi K, et al. Clinical Features of Thoracic Myelopathy: A Single-Center Study. <i>JAAOS Glob Res Rev</i> . 2019;3(11):e18.00090. doi:10.5435/jaaosglobal-d-18-00090                                                                                                                                       |
| 15. | Sato T, Kokubun S, Tanaka Y, Ishii Y. Thoracic myelopathy in the Japanese: epidemiological and clinical observations on the cases in Miyagi Prefecture. Published                                                                                                                                                                  |

|     |                                                                                                                                                                                                                                                                                    |
|-----|------------------------------------------------------------------------------------------------------------------------------------------------------------------------------------------------------------------------------------------------------------------------------------|
|     | online 1998;184(1):1-11.                                                                                                                                                                                                                                                           |
| 16. | Hou X, Sun C, Liu X, et al. Clinical features of thoracic spinal stenosis-associated myelopathy. <i>J Spinal Disord Tech.</i> 2016;29(2):86-89. doi:10.1097/BSD.0000000000000081                                                                                                   |
| 17. | Zhu S, Wang Y, Yin P, Su Q. A systematic review of surgical procedures on thoracic myelopathy. <i>J Orthop Surg Res.</i> 2020;15(1):1-10. doi:10.1186/s13018-020-02081-y                                                                                                           |
| 18. | Chen G, Fan T, Yang X, Sun C, Fan D, Chen Z. The prevalence and clinical characteristics of thoracic spinal stenosis: a systematic review. <i>Eur Spine J.</i> 2020;29(9):2164-2172. doi:10.1007/s00586-020-06520-6                                                                |
| 19. | Chen G, Fan T, Yang X, Sun C, Fan D, Chen Z. The prevalence and clinical characteristics of thoracic spinal stenosis: a systematic review. <i>Eur Spine J.</i> 2020;29(9):2164-2172. doi:10.1007/s00586-020-06520-6                                                                |
| 20. | Yan C, Tan HY, Ji CL, et al. The clinical value of three-dimensional measurement in the diagnosis of thoracic myelopathy caused by ossification of the ligamentum flavum. <i>Quant Imaging Med Surg.</i> 2021;11(5):2040-2051. doi:10.21037/qims-20-713                            |
| 21. | Yoshihara H. Surgical treatment for thoracic disc herniation: An update. <i>Spine (Phila Pa 1976).</i> 2014;39(6). doi:10.1097/BRS.0000000000000171                                                                                                                                |
| 22. | Court C, Mansour E, Bouthors C. Thoracic disc herniation: Surgical treatment. <i>Orthop Traumatol Surg Res.</i> 2018;104(1):S31-S40. doi:10.1016/j.otsr.2017.04.022                                                                                                                |
| 23. | Quint U, Bordon G, Preissl I, Sanner C, Rosenthal D. Thoracoscopic treatment for single level symptomatic thoracic disc herniation: A prospective followed cohort study in a group of 167 consecutive cases. <i>Eur Spine J.</i> 2012;21(4):637-645. doi:10.1007/s00586-011-2103-0 |
| 24. | Stino AM, Lorusso SJ. Myelopathies Due to Structural Cervical and Thoracic Disease. <i>Contin Lifelong Learn Neurol.</i> 2018;24(2, Spinal Cord Disorders):567-583. doi:10.1212/CON.0000000000000594                                                                               |
| 25. | Schimel S, Deeb ZL. Herniated thoracic intervertebral disks. <i>J Comput Tomogr.</i> 1985;9(2):141-143. doi:10.1016/0149-936X(85)90009-8                                                                                                                                           |
| 26. | Hott JS, Feiz-Erfan I, Kenny K, Dickman CA. Surgical management of giant herniated thoracic discs: analysis of 20 cases. <i>J Neurosurg Spine.</i> 2005;3(3):191-197. doi:10.3171/spi.2005.3.3.0191                                                                                |
| 27. | Gay CW, Bishop MD, Beres JL. Clinical presentation of a patient with thoracic myelopathy at a chiropractic clinic. <i>J Chiropr Med.</i> 2012;11(2):115-120. doi:10.1016/j.jcm.2011.10.007                                                                                         |
| 28. | Marzluff JM, Hungerford GD, Kempe LG, Rawe SE, Trevor R, Perot PL. Thoracic myelopathy caused by osteophytes of the articular processes. Thoracic spondylosis. <i>J Neurosurg.</i> 1979;50(6):779-783. doi:10.3171/jns.1979.50.6.0779                                              |
| 29. | Shimada Y, Kasukawa Y, Miyakoshi N, Hongo M, Ando S, Itoi E. Spondylolisthesis of the thoracic spine. Case report. <i>J Neurosurg Spine.</i> 2006;4(5):415-418. doi:10.3171/spi.2006.4.5.415                                                                                       |
| 30. | Hsieh PC, Lee ST, Chen JF. Lower thoracic degenerative spondylithesis with concomitant lumbar spondylosis. <i>Clin Neurol Neurosurg.</i> 2014;118:21-25. doi:10.1016/j.clineuro.2013.11.019                                                                                        |
| 31. | Ploumis A, Transfledt EE, Denis F. Degenerative lumbar scoliosis associated with spinal stenosis. 2007;7:428-436. doi:10.1016/j.spinee.2006.07.015                                                                                                                                 |
| 32. | Stapleton CJ, Pham MH, Attenello FJ, Hsieh PC. Ossification of the posterior                                                                                                                                                                                                       |

|     |                                                                                                                                                                                                                                                                                                            |
|-----|------------------------------------------------------------------------------------------------------------------------------------------------------------------------------------------------------------------------------------------------------------------------------------------------------------|
|     | longitudinal ligament: Genetics and pathophysiology. <i>Neurosurg Focus</i> . 2011;30(3):22-25. doi:10.3171/2010.12.FOCUS10271                                                                                                                                                                             |
| 33. | Stetler WR, La Marca F, Park P. The genetics of ossification of the posterior longitudinal ligament. <i>Neurosurg Focus</i> . 2011;30(3):40-42. doi:10.3171/2010.12.FOCUS10275                                                                                                                             |
| 34. | Inamasu J, Guiot BH, Sachs DC. Ossification of the posterior longitudinal ligament: An update on its biology, epidemiology, and natural history. <i>Neurosurgery</i> . 2006;58(6):1027-1038. doi:10.1227/01.NEU.0000215867.87770.73                                                                        |
| 35. | Ning S, Chen Z, Fan D, et al. Genetic differences in osteogenic differentiation potency in the thoracic ossification of the ligamentum flavum under cyclic mechanical stress. <i>Int J Mol Med</i> . 2017;39(1):135-143. doi:10.3892/ijmm.2016.2803                                                        |
| 36. | Daniels AH, McDonald CL, Basques BA, Kuris EO. Ossified Ligamentum Flavum: Epidemiology, Treatment, and Outcomes. <i>J Am Acad Orthop Surg</i> . 2022;30(12):E842-E851. doi:10.5435/JAAOS-D-21-01253                                                                                                       |
| 37. | Yayama T, Mori K, Okumura N, et al. Wnt signaling pathway correlates with ossification of the spinal ligament: A microRNA array and immunohistochemical study. <i>J Orthop Sci</i> . 2018;23(1):26-31. doi:10.1016/j.jos.2017.09.024                                                                       |
| 38. | Maigne JY, Ayrat X, Guérin-Surville H. Frequency and size of ossifications in the caudal attachments of the ligamentum flavum of the thoracic spine. Role of rotatory strains in their development - An anatomic study of 121 spines. <i>Surg Radiol Anat</i> . 1992;14(2):119-124. doi:10.1007/BF01794886 |
| 39. | Miyakoshi N, Shimada Y, Suzuki T, et al. Factors related to long-term outcome after decompressive surgery for ossification of the ligamentum flavum of the thoracic spine. <i>J Neurosurg</i> . 2003;99(3 Suppl):251-256. doi:10.3171/spi.2003.99.3.0251                                                   |
| 40. | Liao CC, Chen TY, Jung SM, Chen LR. Surgical experience with symptomatic thoracic ossification of the ligamentum flavum. <i>J Neurosurg Spine</i> . 2005;2(1):34-39. doi:10.3171/spi.2005.2.1.0034                                                                                                         |
| 41. | Li Z, Ren D, Zhao Y, et al. Clinical characteristics and surgical outcome of thoracic myelopathy caused by ossification of the ligamentum flavum: A retrospective analysis of 85 cases. <i>Spinal Cord</i> . 2016;54(3):188-196. doi:10.1038/sc.2015.139                                                   |
| 42. | Yu S, Wu D, Li F, Hou T. Surgical results and prognostic factors for thoracic myelopathy caused by ossification of ligamentum flavum: Posterior surgery by laminectomy. <i>Acta Neurochir (Wien)</i> . 2013;155(7):1169-1177. doi:10.1007/s00701-013-1694-0                                                |
| 43. | Lang N, Yuan HS, Wang HL, et al. Epidemiological survey of ossification of the ligamentum flavum in thoracic spine: CT imaging observation of 993 cases. <i>Eur Spine J</i> . 2013;22(4):857-862. doi:10.1007/s00586-012-2492-8                                                                            |
| 44. | Ando K, Imagama S, Ito Z, et al. Predictive factors for a poor surgical outcome with thoracic ossification of the ligamentum flavum by multivariate analysis: A multicenter study. <i>Spine (Phila Pa 1976)</i> . 2013;38(12). doi:10.1097/BRS.0b013e31828ff736                                            |
| 45. | Miyasaka K, Kaneda K, Sato S, et al. Myelopathy due to ossification or calcification of the ligamentum flavum: radiologic and histologic evaluations. <i>Am J Neuroradiol</i> . 1983;4(3):629-632.                                                                                                         |
| 46. | Mori K, Kasahara T, Mimura T, et al. Prevalence, distribution, and morphology of thoracic ossification of the yellow ligament in Japanese; results of ct-based cross-sectional study. <i>Spine (Phila Pa 1976)</i> . 2013;38(19). doi:10.1097/BRS.0b013e31829e018b                                         |
| 47. | Guo JJ, Luk KDK, Karppinen J, Yang H, Cheung KMC. Prevalence, distribution, and                                                                                                                                                                                                                            |

|     |                                                                                                                                                                                                                                                                                                             |
|-----|-------------------------------------------------------------------------------------------------------------------------------------------------------------------------------------------------------------------------------------------------------------------------------------------------------------|
|     | morphology of ossification of the ligamentum flavum: A population study of one thousand seven hundred thirty-six magnetic resonance imaging scans. <i>Spine (Phila Pa 1976)</i> . 2010;35(1):51-56. doi:10.1097/BRS.0b013e3181b3f779                                                                        |
| 48. | Kang KC, Lee CS, Shin SK, Park SJ, Chung CH, Chung SS. Ossification of the ligamentum flavum of the thoracic spine in the Korean population: Clinical article. <i>J Neurosurg Spine</i> . 2011;14(4):513-519. doi:10.3171/2010.11.SPINE10405                                                                |
| 49. | Fan T, Meng X, Sun C, et al. Genome-wide DNA methylation profile analysis in thoracic ossification of the ligamentum flavum. <i>J Cell Mol Med</i> . 2020;24(15):8753-8762. doi:10.1111/jcmm.15509                                                                                                          |
| 50. | Qu X, Chen Z, Fan D, et al. Notch signaling pathways in human thoracic ossification of the ligamentum flavum. <i>J Orthop Res</i> . 2016;34(8):1481-1491. doi:10.1002/jor.23303                                                                                                                             |
| 51. | Chen Q, Wang J han, Wang Y, et al. Connexin 43 affects thoracic ossification of ligamentum flavum by regulating the p38 MAPK-RUNX2 signaling pathway. <i>Tissue Cell</i> . 2022;76(January):101760. doi:10.1016/j.tice.2022.101760                                                                          |
| 52. | Yang X, Chen Z, Meng X, et al. Angiopoietin-2 promotes osteogenic differentiation of thoracic ligamentum flavum cells via modulating the Notch signaling pathway. <i>PLoS One</i> . 2018;13(12):1-11. doi:10.1371/journal.pone.0209300                                                                      |
| 53. | Yang X, Sun C, Meng X, et al. LGR5 regulates osteogenic differentiation of human thoracic ligamentum flavum cells by Wnt signalling pathway . <i>J Cell Mol Med</i> . 2022;(February 2021):3862-3872. doi:10.1111/jcmm.17420                                                                                |
| 54. | Qu X, Hou X, Chen Z, Chen G, Fan T, Yang X. Association analysis and functional study of COL6A1 single nucleotide polymorphisms in thoracic ossification of the ligamentum flavum in the Chinese Han population. <i>Eur Spine J</i> . 2021;30(10):2782-2790. doi:10.1007/s00586-021-06932-y                 |
| 55. | FAN D, CHEN Z, WANG D, GUO Z, QIANG Q, SHANG Y. Osterix Is a Key Target for Mechanical Signals in Human Thoracic Ligament Flavum Cells. <i>J Cell Physiol</i> . 2007;(211):577-584.                                                                                                                         |
| 56. | Mobbs RJ, Dvorak M. Ossification of the ligamentum flavum: Diet and genetics. <i>J Clin Neurosci</i> . Published online 2007:703-705.                                                                                                                                                                       |
| 57. | Wang W, Kong L, Zhao H, et al. Thoracic ossification of ligamentum flavum caused by skeletal fluorosis. <i>Eur Spine J</i> . 2007;16(8):1119-1128. doi:10.1007/s00586-006-0242-5                                                                                                                            |
| 58. | Zhang H, Deng N, Zhang L, Zhang L, Wang C. Clinical Risk Factors for Thoracic Ossification of the Ligamentum Flavum: A Cross-Sectional Study Based on Spinal Thoracic Three-Dimensional Computerized Tomography. <i>Risk Manag Healthc Policy</i> . 2022;Volume 15(May):1065-1072. doi:10.2147/rmhp.s361730 |
| 59. | Endo T, Takahata M, Koike Y, Iwasaki N. Clinical characteristics of patients with thoracic myelopathy caused by ossification of the posterior longitudinal ligament. <i>J Bone Miner Metab</i> . 2020;38(1):63-69. doi:10.1007/s00774-019-01026-8                                                           |
| 60. | Zhai J, Guo S, Li J, Chen B. Progression of Spinal Ligament Ossification in Patients with Thoracic Myelopathy. 2022;(82072508):1-6. doi:10.1111/os.13291                                                                                                                                                    |
| 61. | Baaj AA, Smith DA, Vale FL, Uribe JS. Surgical approaches to thoracic ossification of the posterior longitudinal ligament. <i>J Clin Neurosci</i> . 2012;19(3):349-351. doi:10.1016/j.jocn.2011.05.025                                                                                                      |
| 62. | Ono M, Russell WJ, Kudo S, et al. Ossification of the thoracic posterior longitudinal ligament in a fixed population. Radiological and neurological manifestations. <i>Radiology</i> . 1982;143(2):469-474. doi:10.1148/radiology.143.2.7071349                                                             |
| 63. | Liang H, Liu G, Lu S, et al. Epidemiology of ossification of the spinal ligaments and                                                                                                                                                                                                                       |

|     |                                                                                                                                                                                                                                                                                                                                  |
|-----|----------------------------------------------------------------------------------------------------------------------------------------------------------------------------------------------------------------------------------------------------------------------------------------------------------------------------------|
|     | associated factors in the Chinese population: A cross-sectional study of 2000 consecutive individuals. <i>BMC Musculoskelet Disord.</i> 2019;20(1):1-12. doi:10.1186/s12891-019-2569-1                                                                                                                                           |
| 64. | Wang P, Liu X, Zhu B, et al. Association of IL17RC and COL6A1 genetic polymorphisms with susceptibility to ossification of the thoracic posterior longitudinal ligament in Chinese patients. <i>J Orthop Surg Res.</i> 2018;13(1):1-6. doi:10.1186/s13018-018-0817-y                                                             |
| 65. | Wang P, Teng Z, Liu X, Liu X, Kong C, Lu S. A new single nucleotide polymorphism affects the predisposition to thoracic ossification of the posterior longitudinal ligament. <i>J Orthop Surg Res.</i> 2019;14(1):1-8. doi:10.1186/s13018-019-1481-6                                                                             |
| 66. | Wang P, Teng Z, Liu X, Liu X, Kong C, Lu S. The COL6A1 rs201153092 single nucleotide polymorphism, associates with thoracic ossification of the posterior longitudinal ligament. <i>Mol Med Rep.</i> 2020;21(1):191-200. doi:10.3892/mmr.2019.10846                                                                              |
| 67. | Wang P, Liu X, Zhu B, et al. Identification of susceptibility loci for thoracic ossification of the posterior longitudinal ligament by whole-genome sequencing. <i>Mol Med Rep.</i> 2018;17(2):2557-2564. doi:10.3892/mmr.2017.8171                                                                                              |
| 68. | Goto K, Yamazaki M, Tagawa M, et al. Involvement of insulin-like growth factor I in development of ossification of the posterior longitudinal ligament of the spine. <i>Calcif Tissue Int.</i> 1998;62(2):158-165. doi:10.1007/s002239900410                                                                                     |
| 69. | Kamakura D, Fukutake K, Nakamura K, et al. Acromegaly presenting with myelopathy due to ossification of posterior longitudinal ligament: a case report. <i>BMC Musculoskelet Disord.</i> 2021;22(1):1-7. doi:10.1186/s12891-021-04232-6                                                                                          |
| 70. | Ikeda Y, Nakajima A, Aiba A, et al. Association between serum leptin and bone metabolic markers, and the development of heterotopic ossification of the spinal ligament in female patients with ossification of the posterior longitudinal ligament. <i>Eur Spine J.</i> 2011;20(9):1450-1458. doi:10.1007/s00586-011-1688-7     |
| 71. | Aizawa T, Sato T, Tanaka Y, et al. Thoracic myelopathy in Japan: Epidemiological retrospective study in Miyagi Prefecture during 15 years. <i>Tohoku J Exp Med.</i> 2006;210(3):199-208. doi:10.1620/tjem.210.199                                                                                                                |
| 72. | Filatov A, Hammond TC, Swerdloff MA. Compressive Thoracic Myelopathy. <i>Compressive Thorac Myelopathy Neurol Neurol Sci Open Access.</i> 2021;4(2):1023. <a href="http://meddocsonline.org/">http://meddocsonline.org/</a>                                                                                                      |
| 73. | Imagama S, Ando K, Kobayashi K, et al. Factors for a good surgical outcome in posterior decompression and dekyphotic corrective fusion with instrumentation for thoracic ossification of the posterior longitudinal ligament: Prospective single-center study. <i>Oper Neurosurg.</i> 2017;13(6):661-669. doi:10.1093/ons/oxp043 |
| 74. | Kim DH, Lee SH, Lee JS, Song GS, Son DW. High thoracic ossification of ligamentum flavum causing partial Horner syndrome. <i>Br J Neurosurg.</i> 2021;35(2):231-232. doi:10.1080/02688697.2018.1441976                                                                                                                           |
| 75. | Cong M, Si M, Hou Y, Ma H, Nie L. Foot drop as the initial symptom caused by thoracic disc herniation. <i>Eur Spine J.</i> 2022;31(7):1795-1801. doi:10.1007/s00586-022-07254-3                                                                                                                                                  |
| 76. | Martinez-Del-Campo E, Moon K, Kalb S, Soriano-Baron H, Theodore N. Surgical management of a patient with thoracic spinal cord herniation: Technical case report and review. <i>Neurosurgery.</i> 2015;77(3):E492-E498. doi:10.1227/NEU.0000000000000860                                                                          |
| 77. | Oyinkan Marquis B, Capone PM. Myelopathy. <i>Handb Clin Neurol.</i> 2016;136:1015-1026. doi:10.1016/B978-0-444-53486-6.00052-1                                                                                                                                                                                                   |
| 78. | Matsuyama Y, Yoshihara H, Tsuji T, et al. Surgical outcome of ossification of the                                                                                                                                                                                                                                                |

|     |                                                                                                                                                                                                                                                                                                                                                                   |
|-----|-------------------------------------------------------------------------------------------------------------------------------------------------------------------------------------------------------------------------------------------------------------------------------------------------------------------------------------------------------------------|
|     | posterior longitudinal ligament (OPLL) of the thoracic spine: Implication of the type of ossification and surgical options. <i>J Spinal Disord Tech.</i> 2005;18(6):492-497. doi:10.1097/01.bsd.0000155033.63557.9c                                                                                                                                               |
| 79. | Chang UK, Choe WG, Chung CK, Kim HJ. Surgical treatment for thoracic spinal stenosis. <i>Spinal Cord.</i> 2001;39(7):362-369. doi:10.1038/sj.sc.3101174                                                                                                                                                                                                           |
| 80. | Min JH, Jang JS, Lee SH. Clinical results of ossification of the posterior longitudinal ligament (OPLL) of the thoracic spine treated by anterior decompression. <i>J Spinal Disord Tech.</i> 2008;21(2):116-119. doi:10.1097/BSD.0b013e318060091a                                                                                                                |
| 81. | Quraishi NA, Khurana A, Tsegaye MM, Boszczyk BM, Mehdian SMH. Calcified giant thoracic disc herniations: Considerations and treatment strategies. <i>Eur Spine J.</i> 2014;23(SUPPL. 1):76-83. doi:10.1007/s00586-014-3210-5                                                                                                                                      |
| 82. | Khoo LT, Smith ZA, Asgarzadie F, et al. Minimally invasive extracavitary approach for thoracic discectomy and interbody fusion: 1-Year clinical and radiographic outcomes in 13 patients compared with a cohort of traditional anterior transthoracic approaches - Clinical article. <i>J Neurosurg Spine.</i> 2011;14(2):250-260. doi:10.3171/2010.10.SPINE09456 |
| 83. | Zhao W, Shen C, Cai R, et al. Minimally invasive surgery for resection of ossification of the ligamentum flavum in the thoracic spine. <i>Wideochirurgia I Inne Tech Maloinwazyjne.</i> 2017;12(1):96-105. doi:10.5114/wiitm.2017.66473                                                                                                                           |
| 84. | Okada K, Oka S, Tohge K, Ono K, Yonenobu K, Hosoya T. Thoracic myelopathy caused by ossification of the ligamentum flavum: Clinicopathologic study and surgical treatment. <i>Transplantation.</i> 1973;16(3):280-287. doi:10.1097/00007632-199103000-00005                                                                                                       |
| 85. | He S, Hussain N, Li S, Hou T. Clinical and prognostic analysis of ossified ligamentum flavum in a Chinese population. <i>J Neurosurg Spine.</i> 2005;3(5):348-354. doi:10.3171/spi.2005.3.5.0348                                                                                                                                                                  |
| 86. | Sung UK, Young SK, Yong EC, et al. Contributing factors affecting the prognosis surgical outcome for thoracic OLF. <i>Eur Spine J.</i> 2006;15(4):485-491. doi:10.1007/s00586-005-0903-9                                                                                                                                                                          |
| 87. | Patel N. Surgical disorders of the thoracic and lumbar spine: Guide for neurologists. <i>Neurol Pract.</i> 2002;73(1).                                                                                                                                                                                                                                            |
